# Supplementary material for: Synergy between RA and TLR3 promotes type I IFN-dependent apoptosis through upregulation of TRAIL pathway in breast cancer cells
Source: PubMed Central journal article supplement — Cell Death Dis. 2013 Jan 31;4(1):e479–. doi: 10.1038/cddis.2013.5 (PMC3564005; doi:10.1038/cddis.2013.5), 2013-01-31
Supplement: cddis20135x1.pdf [file cddis20135x1.pdf]

**Supplementary Table 1.** qPCR Primer List.

| <b>Gene</b>    | <b>Orientation</b> | <b>Sequence (5'→ 3')</b>  |
|----------------|--------------------|---------------------------|
| CCL5           | Forward            | CGCTGTCATCCTCATTGCTACTG   |
|                | Reverse            | GCAGGGTGTGGTGTCCGAG       |
| CXCL10         | Forward            | CTGAAAGCAGTTAGCAAGGAAAGG  |
|                | Reverse            | GGGAAGTGATGGGAGAGGCAG     |
| IFN $\beta$    | Forward            | ATGACCAACAAGTGTCTCCTCC    |
|                | Reverse            | GCTCATGGAAAGAGCTGTAGTG    |
| IL8            | Forward            | AAGACATACTCCAAACCTTTCCACC |
|                | Reverse            | AAAACCTTCTCCACAACCCTCTGC  |
| MDA-5          | Forward            | ACCAAATACAGGAGCCATGC      |
|                | Reverse            | CGTTCTTTGCGATTTCTTC       |
| PKR            | Forward            | TGGAAAGCGAACAAGGAGTAAG    |
|                | Reverse            | CCATCCCGTAGGTCTGTGAA      |
| RIG-1          | Forward            | TGGACCATGAGTACCAACCA      |
|                | Reverse            | GCCACACCAACTTCAACCTT      |
| TLR3           | Forward            | AAGAGTTTTCTCCAGGGTGTTTT   |
|                | Reverse            | CAGATTCCGAATGCTTGTGTTTG   |
| TRAIL          | Forward            | AGTGAGAGAAAGAGGTCCTCAG    |
|                | Reverse            | CCAGAGCCTTTTCATTCTTGGA    |
| $\beta$ -actin | Forward            | AACTCCATCATGAAGTGTGACG    |
|                | Reverse            | GATCCACATCTGCTGGAAGG      |
