# Supplementary material for: Synergy between RA and TLR3 promotes type I IFN-dependent apoptosis through upregulation of TRAIL pathway in breast cancer cells
Source: PubMed Central journal article supplement — Cell Death Dis. 2013 Jan 31;4(1):e479–. doi: 10.1038/cddis.2013.5 (PMC3564005; doi:10.1038/cddis.2013.5), 2013-01-31
Supplement: cddis20135x2.pdf [file cddis20135x2.pdf]

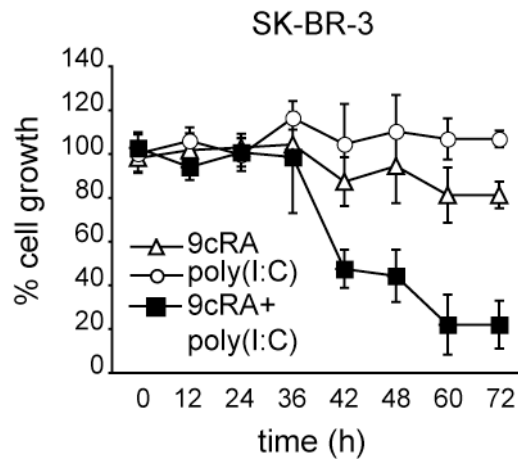

**Supplementary Figure S1.** 9cRA and poly(I:C) inhibit cell growth in a time-dependent manner in SK-BR-3 breast cancer cells. SK-BR-3 cells were treated with 9cRA ( $10^{-6}$  M) and/or poly(I:C) (50  $\mu$ g/ml) for different time periods. Viability was measured by crystal violet. The results are shown as percentage of the values obtained in control conditions (cells treated with vehicle). Data represent the mean  $\pm$  SD of three different experiments.
